# Supplementary material for: PilB from Streptococcus sanguinis is a bimodular type IV pilin with a direct role in adhesion
Source: PubMed Central journal article supplement (PMC8179133; doi:10.1073/pnas.2102092118), 2021-05-24
Supplement: pnas.2102092118.sapp.pdf [file pnas.2102092118.sapp.pdf]

1 **PilB from *Streptococcus sanguinis* is a bimodular type IV pilin with a direct**  
2 **role in adhesion**

3

4 Claire Raynaud<sup>a,1</sup>, Devon Sheppard<sup>a,1</sup>, Jamie-Lee Berry<sup>a</sup>, Ishwori Gurung<sup>a</sup>, Vladimir  
5 Pelicic<sup>a,b,2</sup>

6

7 <sup>a</sup>MRC Centre for Molecular Bacteriology and Infection, Imperial College London,  
8 London SW7 2AZ, United Kingdom

9

10 <sup>b</sup>Laboratoire de Chimie Bactérienne, Aix-Marseille Université-CNRS (UMR7283),  
11 Institut de Microbiologie de la Méditerranée, 13009 Marseille, France

12

13 <sup>1</sup>C.R. and D.S. contributed equally to this work

14

15 <sup>2</sup>To whom correspondence may be addressed. Email: vladimir.pelicic@inserm.fr

16 **Materials and methods**

17

18 **Strains and growth conditions**

19 *E. coli* was grown in liquid or solid Lysogenic Broth (LB) (Difco) containing, when  
20 required, 100 µg/ml spectinomycin or 50 µg/ml kanamycin (both from Sigma). For  
21 purification of protein labelled with seleno-methionine (SeMet), bacteria were grown  
22 in chemically defined medium (CDM) supplemented with 20 mg/ml SeMet (Sigma).

23 *S. sanguinis* was grown on plates containing Todd Hewitt (TH) broth (Difco)  
24 and 1 % agar (Difco), incubated at 37°C in anaerobic jars (Oxoid) under anaerobic  
25 conditions generated using Anaerogen sachets (Oxoid) (1). Liquid cultures were  
26 grown statically under aerobic conditions in THT, *i.e.*, TH broth containing 0.05 %  
27 tween 80 (Merck) to limit bacterial clumping(1). When required, 500 µg/ml kanamycin  
28 was used for selection and 15 mM *p*-Cl-Phe (Sigma) for counterselection (2). To  
29 construct the unmarked *S. sanguinis pilB<sub>D319A</sub>* mutant, we replaced the gene in the  
30 WT by a promoterless *pheS\*aphA-3* double cassette, which confers sensitivity to *p*-  
31 Cl-Phe and resistance to kanamycin (2). To do this, we fused by splicing PCR the  
32 upstream and downstream regions flanking *pilB* to *pheS\*aphA-3*, directly transformed  
33 the PCR product into the WT, and selected allelic exchange mutants on kanamycin  
34 plates. Allelic exchange was confirmed by PCR. In the second step, we replaced the  
35 *pheS\*aphA-3* double cassette in this primary mutant by allelic exchange, with an  
36 unmarked *pilB<sub>D319A</sub>* mutation. To do this, we first constructed the missense mutation  
37 by site-directed mutagenesis, using as a template a pCR8/GW/TOPO (Invitrogen)  
38 derivative in which the WT gene was cloned. Then, the PCR product was directly  
39 transformed into the primary mutant, with plating on *p*-Cl-Phe-containing plates.  
40 Markerless allelic exchange mutants, which are the only one sensitive to kanamycin,  
41 were identified by re-streaking colonies on TH plates with and without antibiotic.

42

**43 Protein purification**

44 To purify native PilB, PilB<sub>D319A</sub> and PilB<sub>VWA</sub> proteins, the corresponding pET-28b  
45 derivatives were transformed in *E. coli* BL21(DE3). Transformants were grown O/N at  
46 37°C in liquid LB with kanamycin. The next day, this culture was diluted (1/500) in 1 l  
47 of the same medium and grown at 37°C to an OD<sub>600</sub> of 0.4-0.6. Proteins were purified  
48 as described (3). The temperature was then set to 16°C, the culture allowed to cool  
49 for 30 min, before protein expression was induced O/N by adding 0.5 mM IPTG  
50 (Merck). The next day, cells were harvested by centrifugation at 8,000 g for 20 min  
51 and subjected to one cycle of -80°C freeze/thaw in binding buffer (50 mM HEPES pH  
52 7.4, 200 mM NaCl, 15 mM imidazole), to which we added SIGMAFAST EDTA-free  
53 protease inhibitor cocktail (Sigma). Cells were disrupted by repeated cycles of  
54 sonication, *i.e.*, pulses of 5 sec on and 5 sec off during 3-5 min, until the cell  
55 suspension was visibly less viscous. The cell lysate was then centrifuged for 30 min  
56 at 17,000 g to remove cell debris. The clarified lysate was first affinity-purified on an  
57 ÄKTA Purifier using His-Trap HP columns (GE Healthcare) and eluted with elution  
58 buffer (50 mM HEPES pH 7.4, 200 mM NaCl, 300 mM imidazole). Affinity-purified  
59 proteins were further purified, and simultaneously buffer-exchanged into (50 mM  
60 HEPES pH 7.4, 200 mM NaCl), by gel-filtration chromatography on an ÄKTA Purifier  
61 using a Superdex 75 10/300 GL column (GE Healthcare). Protein concentration was  
62 quantified spectrophotometrically using a NanoDrop Lite (Thermo Fisher Scientific).

63 To purify SeMet-labelled PilB for phasing, the corresponding pET-28b  
64 derivative was transformed in *E. coli* BL21 B834(DE3). Transformants were grown at  
65 37°C in liquid LB with kanamycin, until OD<sub>600</sub> reached 0.6-0.7. Next, the cells were  
66 pelleted at 8,000 g for 5 min, and washed twice with 2 ml of CDM, which contains no  
67 Met. The pellet was then washed with 2 ml of CDM supplemented with 20 mg/ml L-  
68 Met (Sigma) and used to inoculate, at 1/200 dilution, 20 ml of CDM supplemented  
69 with 20 mg/ml Met. This culture was grown at 37°C for 16-18 h. Cells were pelleted  
70 and washed three times with CDM. Then, the pellet was re-suspended in 20 ml of

71 CDM supplemented with 20 mg/ml SeMet, which was used to inoculate 1 l of CDM  
72 supplemented with SeMet. Cells were grown at 37°C until OD<sub>600</sub> reached 0.5-0.7.  
73 The temperature was then set to 16°C, the culture allowed to cool for 30 min, before  
74 protein expression was induced O/N by adding 1 mM IPTG (Merck) and 4 ml of 36 %  
75 glucose (w/v). Two and half hours later, we again added 4 ml of 36 % glucose to the  
76 culture. The next day, SeMet-labelled PilB was purified as above.

77

### 78 **Crystallisation and structure determination**

79 The PilB crystals used for the high-resolution structure determination were obtained  
80 when the purified protein was mixed 1:1 with crystallisation liquor (0.1 M Bis-tris  
81 propane pH 7, 3 M NaCl). The lower resolution PilB<sub>D319A</sub> crystals were obtained with  
82 crystallisation liquor (0.1 M Bis-tris pH 6.5, 3 M NaCl). Crystals were cryoprotected  
83 with 30 % glycerol in crystallisation liquor, and flash-frozen in liquid nitrogen.

84

### 85 **Assaying piliation of *S. sanguinis***

86 To purify *S. sanguinis* T4P (1, 3), bacteria grown in 100 ml THT until the OD<sub>600</sub>  
87 reached 1-1.5, at which point OD were normalised, bacteria pelleted and re-  
88 suspended in pilus buffer (20 mM Tris, pH 7.5, 50 mM NaCl). This suspension was  
89 vortexed for 2 min at full speed to shear T4P. After removing bacterial cells by two  
90 centrifugation steps and filtration through a 0.22 µm pore size syringe filter  
91 (Millipore), pili were pelleted by ultracentrifugation and resuspended in pilus buffer.

92

### 93 **Assaying twitching motility of *S. sanguinis***

94 To assess twitching motility on agar plates (1), bacteria grown O/N were streaked as  
95 straight lines on freshly poured TH plates containing 1 % Eiken agar (Eiken  
96 Chemicals). Plates were grown for several days at 37°C in anaerobic condition under  
97 high humidity, which is necessary for twitching.

98 **References**

- 99 1. I. Gurung *et al.*, Functional analysis of an unusual type IV pilus in the Gram-  
100 positive *Streptococcus sanguinis*. *Mol. Microbiol.* **99**, 380-392 (2016).
- 101 2. I. Gurung, J. L. Berry, A. M. J. Hall, V. Pelicic, Cloning-independent markerless  
102 gene editing in *Streptococcus sanguinis*: novel insights in type IV pilus biology.  
103 *Nucleic Acids Res.* **45**, e40 (2017).
- 104 3. J. L. Berry *et al.*, Global biochemical and structural analysis of the type IV pilus  
105 from the Gram-positive bacterium *Streptococcus sanguinis*. *J. Biol. Chem.* **294**,  
106 6796-6808 (2019).
- 107 4. R. A. Romijn *et al.*, Identification of the collagen-binding site of the von Willebrand  
108 factor A3-domain. *J. Biol. Chem.* **276**, 9985-9991 (2001).
- 109 5. S. Kolappan *et al.*, Structure of the *Neisseria meningitidis* type IV pilus. *Nat.*  
110 *Commun.* **7**, 13015 (2016).
- 111 6. P. Jones *et al.*, InterProScan 5: genome-scale protein function classification.  
112 *Bioinformatics* **30**, 1236-1240 (2014).

113 **Table S1. Strains and plasmids used in this study.**

114

| Name                               | Details                                                       | Source     |
|------------------------------------|---------------------------------------------------------------|------------|
| <b><i>E. coli</i> strains</b>      |                                                               |            |
| DH5 $\alpha$                       | used for cloning                                              |            |
| BL21(DE3)                          | used for protein expression/purification                      |            |
| BL21 B834(DE3)                     | used for SeMet protein expression/purification                |            |
| <b><i>S. sanguinis</i> strains</b> |                                                               |            |
| 2908                               | sequenced WT isolate                                          | (1)        |
| $\Delta pilB$                      | $\Delta pilB::aphA-3$ deletion mutant                         | (1)        |
| $\Delta pilD$                      | $\Delta pilD::aphA-3$ deletion mutant                         | (1)        |
| $\Delta pilB$ primary mutant       | $\Delta pilB::pheS^*aphA-3$ deletion mutant                   | this study |
| $pilB_{D319A}$                     | $pilB$ point mutant expressing PilB <sub>D319A</sub>          | this study |
| <b>Plasmids</b>                    |                                                               |            |
| pCR8/GW/TOPO                       | TA cloning vector                                             | Invitrogen |
| TOPO- $pheS^*aphA-3$               | $pheS^*aphA-3$ double cassette in TOPO                        | (2)        |
| TOPO- $pilB$                       | $pilB$ in TOPO                                                | this study |
| TOPO- $pilB_{D319A}$               | $pilB_{D319A}$ in TOPO                                        | this study |
| pET-28b                            | T7-based expression vector                                    | Novagen    |
| pMK- $pilB$                        | codon-optimised synthetic $pilB$ in pMK                       | (3)        |
| pET28- $pilB$                      | pET-28 derivative for expressing 6His-PilB <sub>36-461</sub>  | (3)        |
| pET28- $pilB_{D319A}$              | pET-28 derivative for expressing 6His-PilB <sub>D319A</sub>   | this study |
| pET28- $pilB_{VWA}$                | pET-2b derivative for expressing 6His-PilB <sub>192-461</sub> | this study |

115

116  $pilB$ , codon-optimised synthetic gene.  $pheS^*$ , point mutant encoding PheS<sub>A316G</sub>.

117 **Table S2. Primers used in this study.**

118

| Name                              | Sequence                                                       |
|-----------------------------------|----------------------------------------------------------------|
| <i>pilB</i> <sub>D319A</sub> #1   | GAAATATATCGTTCTGCTGACCG <b>c</b> TGGTATTCCGAATGCATATCTGG       |
| <i>pilB</i> <sub>D319A</sub> #2   | CCAGATATGCATTCGGAATACCA <b>g</b> CGGTCAGCAGAACGATATATTTTC      |
| <i>pilB</i> <sub>vWA</sub> -pET-F | ggg <b>ccatggat</b> catcatcatcatcatcatCAGGGCCAGATGAATATTGC     |
| <i>pilB</i> <sub>vWA</sub> -pET-R | ccc <b>ggatcc</b> TTACGGACCGCTAACAAACC                         |
| <i>pilB</i> -F                    | TACAACTGGACCGAAGCTGG                                           |
| <i>pilB</i> -R                    | TTTGGCCTATCGTTCCCACT                                           |
| <i>pilB</i> -F1                   | TACAACTGGACCGAAGCTGG                                           |
| <i>pilB</i> -R1                   | gttcttcaatcgttttcgcatcaTTCCCTACCTATTTATTTTACTTCTG              |
| <i>pilB</i> -F2                   | ttttactggatgaattgtttttagAGGATTTGTGGTTTGTATCAGGG                |
| <i>pilB</i> -R2                   | TTTGGCCTATCGTTCCCACT                                           |
| <i>pheS</i> *-F                   | ATGACGAAAACGATTGAAGAAC                                         |
| <i>aph</i> -R                     | CTAAAACAATTTCATCCAGTAAAA                                       |
| <i>pilB</i> <sub>D319A</sub> #1   | GCTTAAATATATAGTTCTATTGACAG <b>c</b> TGGCATACTAATGCTTATTTAGTAG  |
| <i>pilB</i> <sub>D319A</sub> #2   | CTACTAAATAAGCATTAGGTATGCCA <b>g</b> CTGTCAATAGAACTATATATTTAAGC |

119

120 *pilB*, codon-optimised synthetic gene. Overhangs are in lower case. Restriction sites

121 are in bold. Mismatches are in red.

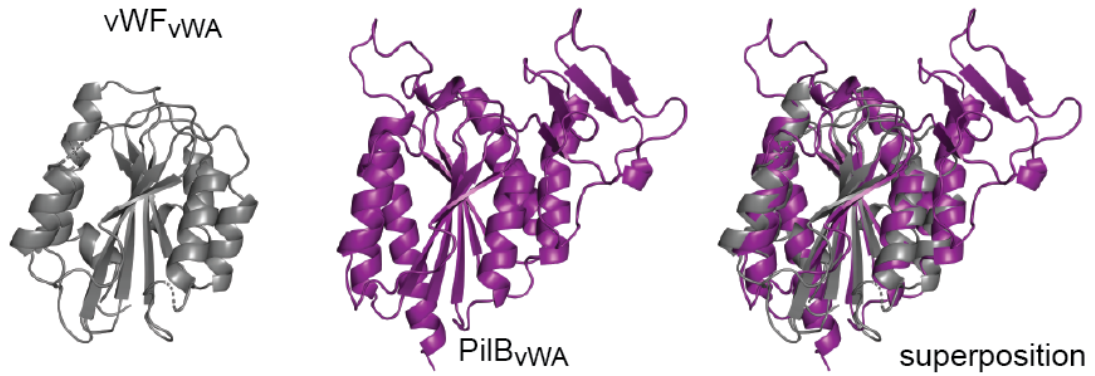

122

123 **Fig. S1. Structural similarity of vWA domains in PiIB and human vWF.** Left, A3  
124 vWA domain in vWF (from PDB 1FE8) (grey) (4). Center, vWA module of PiIB  
125 (purple). Right, superposition of the two structures. While the two sequences share  
126 only 15.6 % sequence identity, the structures superpose with an RMSD of 1.72 Å.



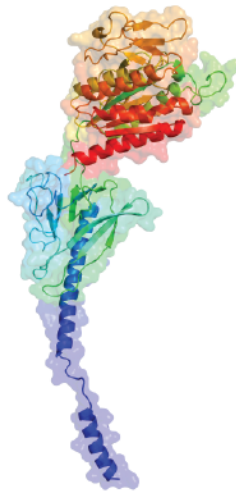

127

128 **Fig. S2. 3D model of full-length PilB with a melted  $\alpha$ 1N segment.** The cryo-EM

129 structure of the *N. meningitidis* T4P (PDB 5KUA) (5) has been used as a template.

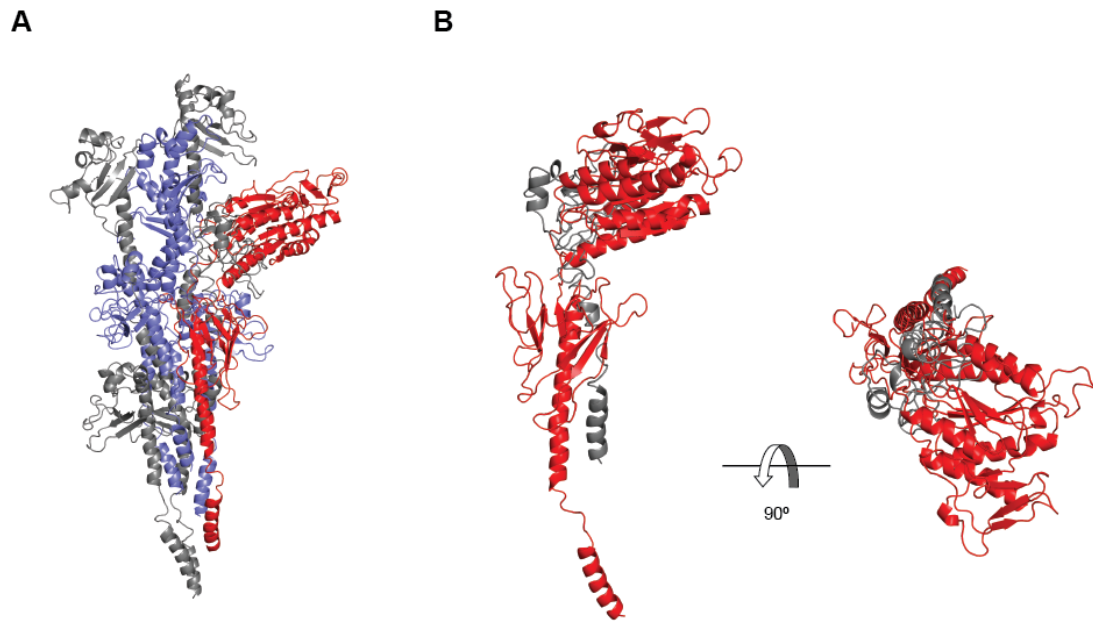

130

131 **Fig. S3. Modelling of PilB in the body of a T4P leads to important steric**  
132 **clashes. A)** Packing of PilB (red) into *S. sanguinis* T4P composed of PilE1 (blue)  
133 and PilE2 (grey). **B)** Close-up view of the important steric clashes between PilB and  
134 PilE subunit above in the filament.

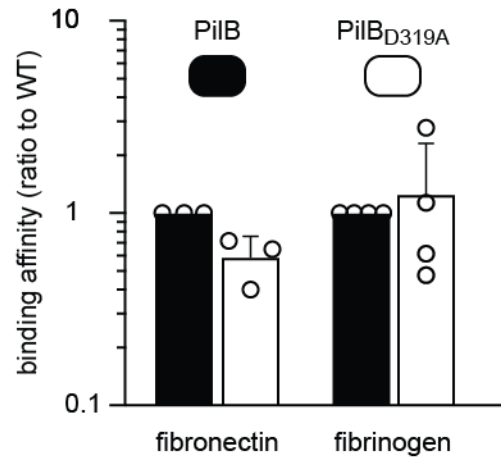

135

136 **Fig. S4. Binding of PiIB<sub>D319A</sub> to fibrinogen and fibronectin.** Increasing  
137 concentrations of purified PiIB were added to constant concentration of immobilised  
138 ligands, and binding was quantified by ELISA. Results are represented as K<sub>d</sub> relative  
139 to WT, which is set to 1. Results are the average ± standard deviations from 3-4  
140 independent experiments.

141 **Supplementary datasets legends**

142

143 **Supplementary dataset 1. List of all the pilin architectures in the InterPro**  
144 **database.** This list was generated by searching the database (November 2020) for  
145 entries displaying an IPR012902 pilin motif (6). Modular pilins display an N-terminal  
146 pilin motif together with additional module(s) not specific to T4P biology. Proteins in  
147 which the pilin motif is not N-terminal are listed as unclear.

148

149 **Supplementary dataset 2. List of all the PilC/PilY1 architectures in the InterPro**  
150 **database.** This list was generated by searching the database (November 2020) for  
151 entries displaying the IPR008707 PilC/PilY1  $\beta$ -propeller domain (6). Modular  
152 PilC/PilY1 display a C-terminal IPR008707 motif together with additional module(s)  
153 not specific to T4P biology. Proteins in which the IPR008707 motif is not C-terminal  
154 are listed as unclear.
